# Supplementary material for: A high pressure study of calmodulin–ligand interactions using small-angle X-ray and elastic incoherent neutron scattering
Source: Royal Society of Chemistry journal article supplement (doi:10.1039/c7cp07399b), 2018-01-01
Supplement: c7cp07399b1.pdf [file c7cp07399b1.pdf]

Electronic supplementary information (ESI)

## High pressure study of calmodulin-ligand interactions using small-angle X-ray and elastic incoherent neutron scattering

Süleyman Cinar,<sup>a</sup> Samy Al-Ayoubi,<sup>a</sup> Christian Sternemann,<sup>b</sup> Judith Peters,<sup>c</sup> Roland Winter<sup>a</sup> and Claus Czeslik<sup>\* a</sup>

<sup>a</sup> Department of Chemistry and Chemical Biology, TU Dortmund University, D-44221 Dortmund, Germany.

<sup>b</sup> Fakultät Physik / DELTA, Technische Universität Dortmund, D-44221 Dortmund, Germany.

<sup>c</sup> Université Grenoble Alpes, CNRS, LiPhy, F-38000 Grenoble, France.

\* corresponding author. E-mail: claus.czeslik@uni-dortmund.de

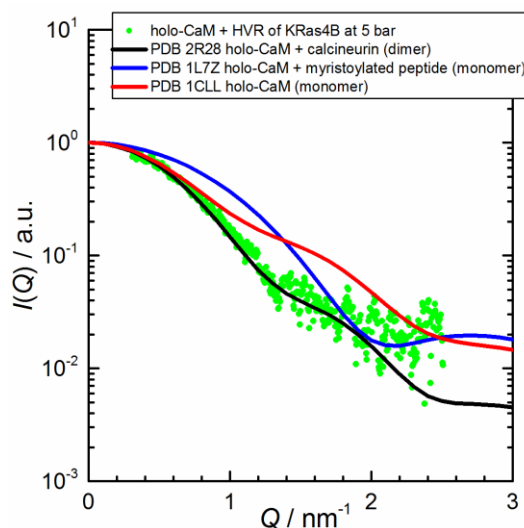

**Fig. S1.** Comparison of the SAXS intensity of the holo-CaM/HVR complex at 5 bar as measured in this study (symbols) with SAXS intensities calculated from PDB data of different crystal structures (solid lines). Only the calculated SAXS curve of the dimer nicely represents the measured SAXS curve of holo-CaM/HVR.

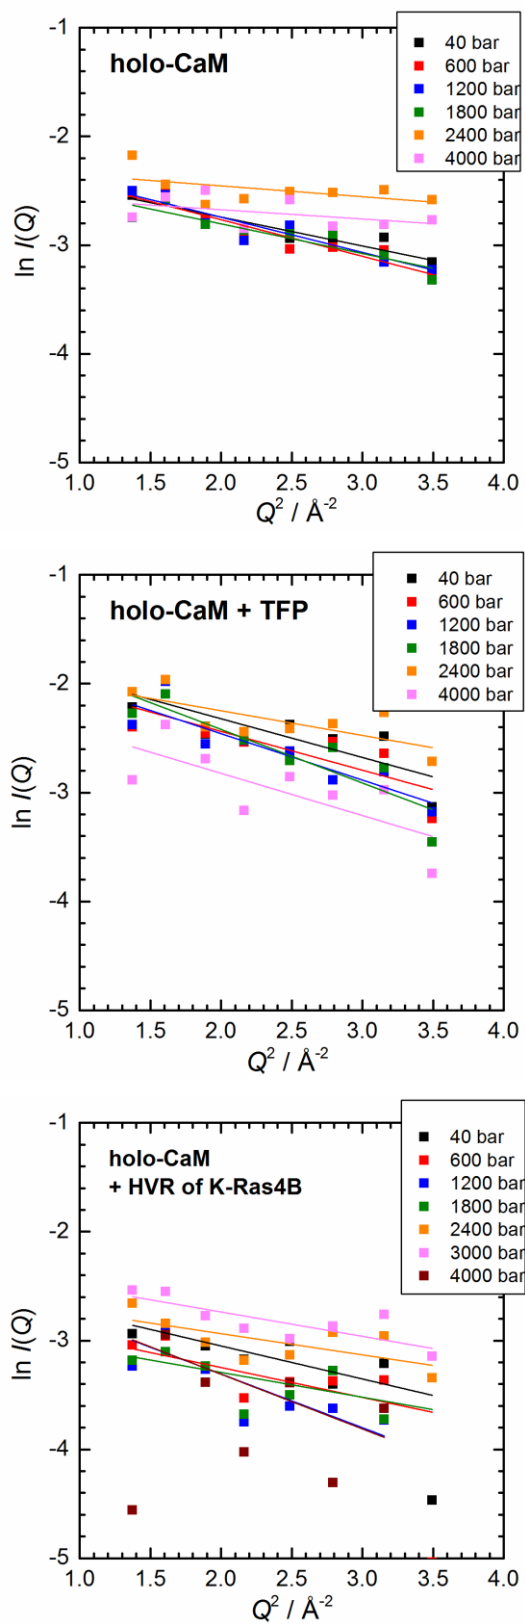

**Fig. S2.** Analysis of the EINS data according to the Gaussian approximation.
